# Supplementary material
Source: publisher figshare collection journal article supplement (https://sage.figshare.com/ndownloader/files/15086207)
Supplement: Supplementary file 1 [file 15086207]

## Web Appendix A

### Study One: Advertisements

Condition: White models

Robert and Rose feel they have  
known each other forever...

But that **doesn't** mean that they  
know everything...

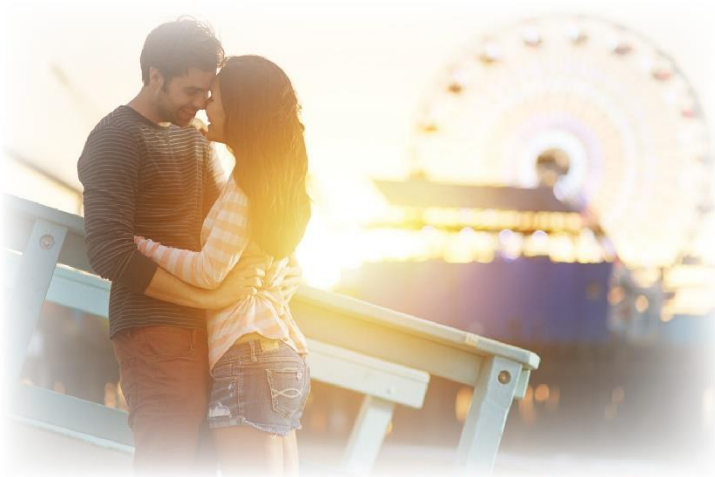

One in four people  
who live with HIV  
don't know it.

Take charge.  
Get a free HIV test.

**Better Safe than Sorry!**

Learn about safer sex by visiting our website:  
[www.health2.org](http://www.health2.org)

Condition: Latino models

Roberto and Rosalinda feel they  
have known each other forever...

But that **doesn't** mean that they  
know everything...

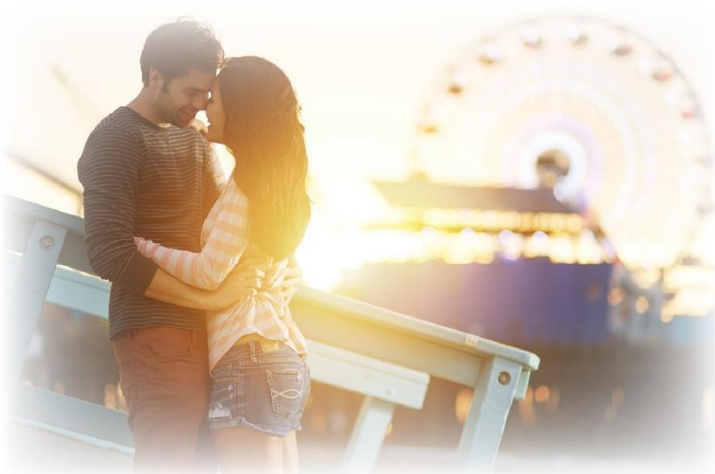

One in four people  
who live with HIV  
don't know it.

Take charge.  
Get a free HIV test.

**Más vale prevenir que lamentar!**

Learn about safer sex by visiting our website:  
[www.health2.org](http://www.health2.org)

Condition: White models

Robert and Rose feel they have  
known each other forever...

But that **doesn't** mean they know  
everything.

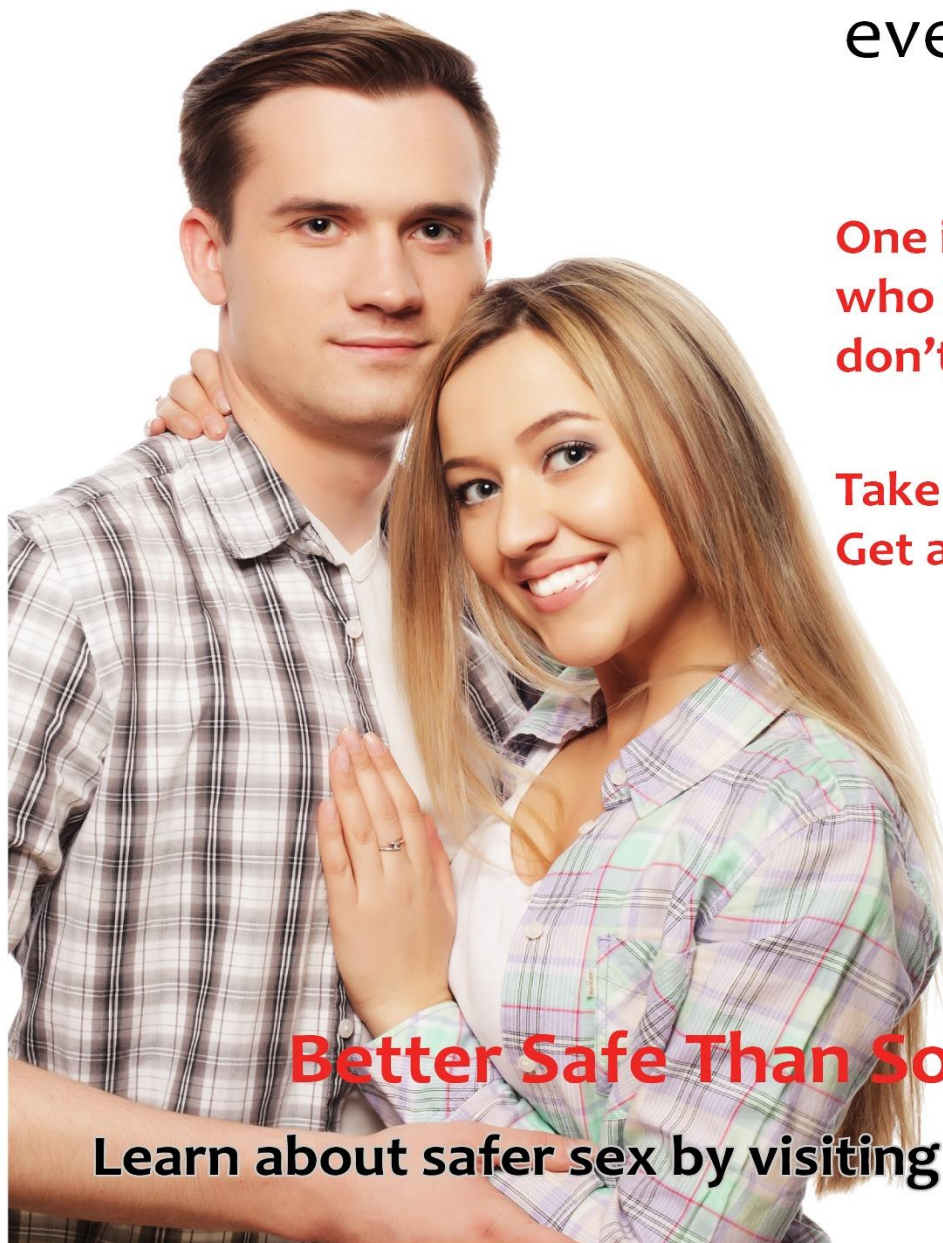

One in four people  
who live with HIV  
don't know it.

Take Charge.  
Get a Free HIV Test.

**Better Safe Than Sorry!**

Learn about safer sex by visiting our website

Condition: Latino Models

Roberto and Rosalinda feel they  
have known each other forever...

But that **doesn't** mean they know  
everything.

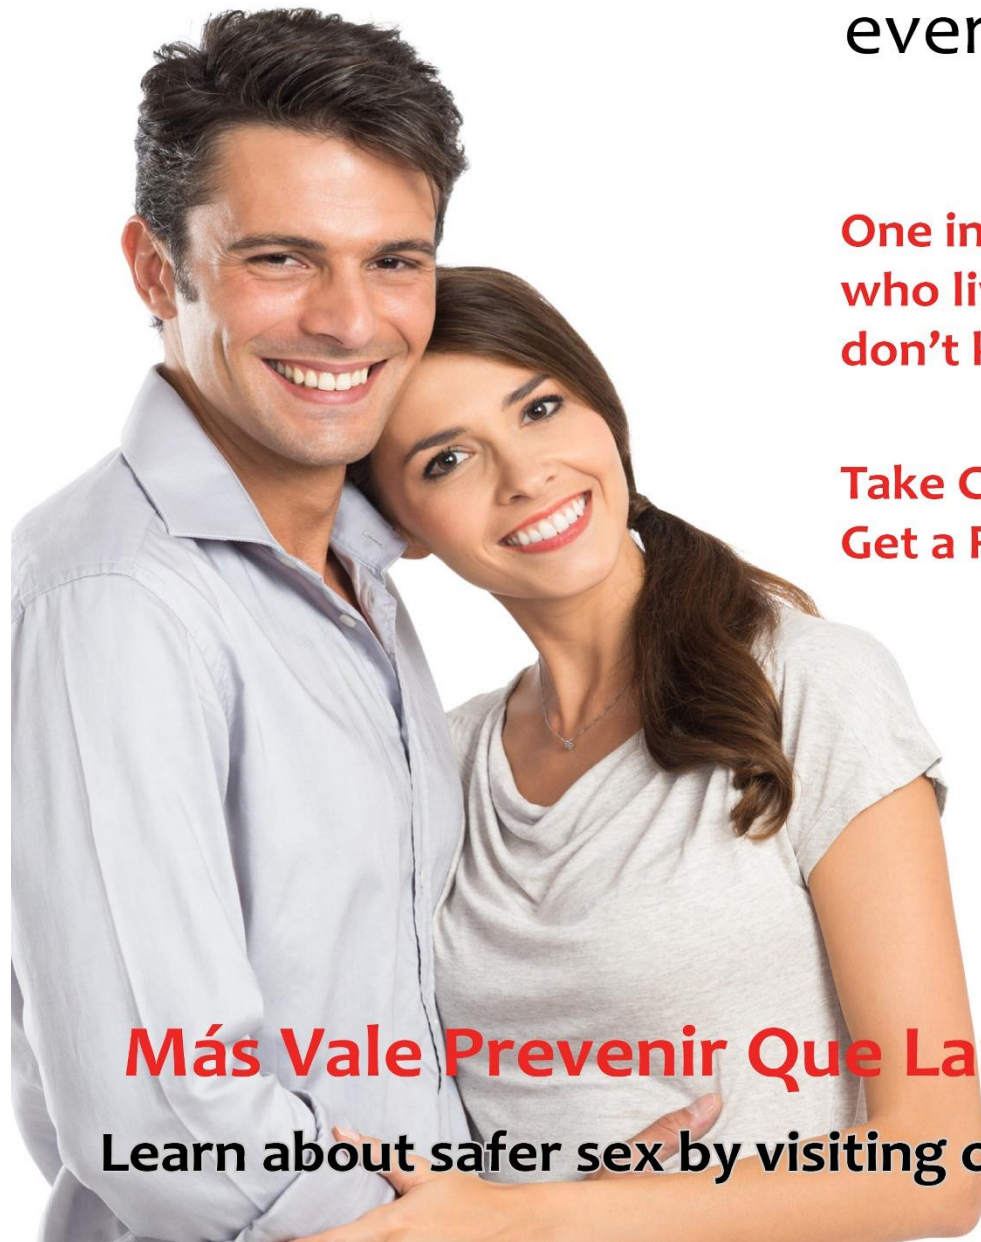

**One in four people  
who live with HIV  
don't know it.**

**Take Charge.  
Get a Free HIV Test.**

**Más Vale Prevenir Que Lamentar!**

**Learn about safer sex by visiting our website**

## Web Appendix C

### Study Three: Advertisements

Condition: Fit models

# Want to keep living a sweet life? Know your risks!

1 out  
of 11 people have Diabetes

1 out  
of 4 people who have  
Diabetes don't know it.

1 out  
of 3 people have Prediabetes

9 out  
of 10 people who have  
Prediabetes don't know it.

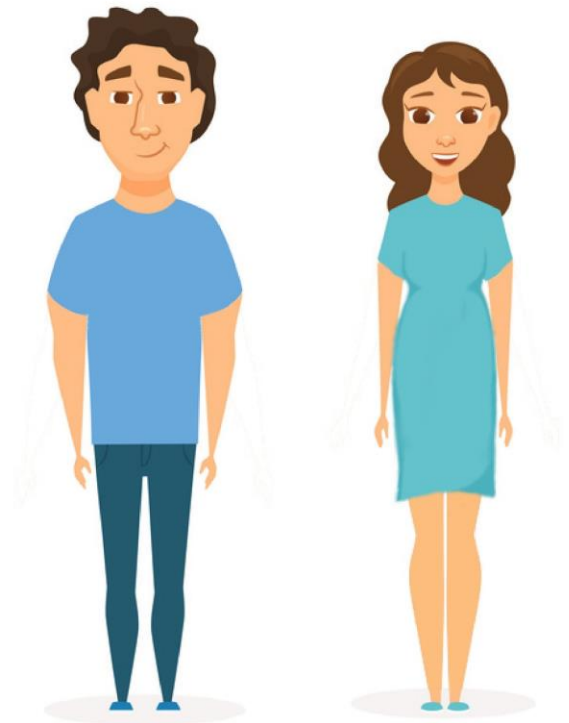

Keep living your sweetest life  
and get tested for Diabetes!

Visit our website to learn about the risk  
factors and treatment options for diabetes,  
and healthy eating strategies:

[www.sweetlifewithoutdiabetes.org](http://www.sweetlifewithoutdiabetes.org)

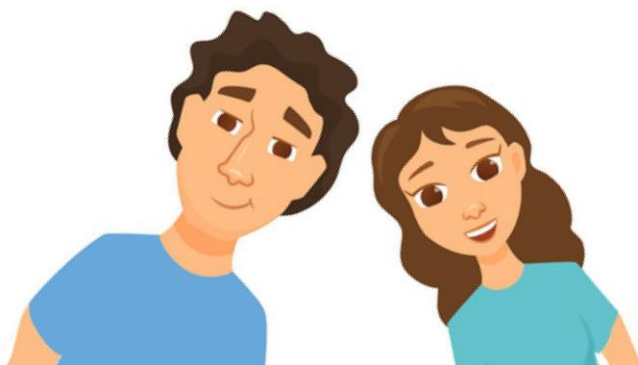

Condition: Obese models

# Want to keep living a sweet life? Know your risks!

1 out  
of 11 people have Diabetes

1 out  
of 4 people who have  
Diabetes don't know it.

1 out  
of 3 people have Prediabetes

9 out  
of 10 people who have  
Prediabetes don't know it.

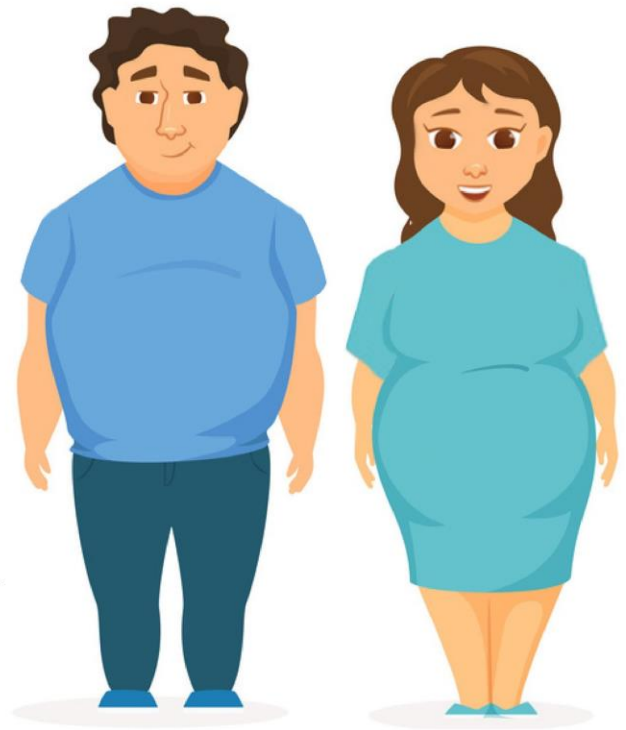

Keep living your sweetest life  
and get tested for Diabetes!

Visit our website to learn about the risk  
factors and treatment options for diabetes,  
and healthy eating strategies:

[www.sweetlifewithoutdiabetes.org](http://www.sweetlifewithoutdiabetes.org)

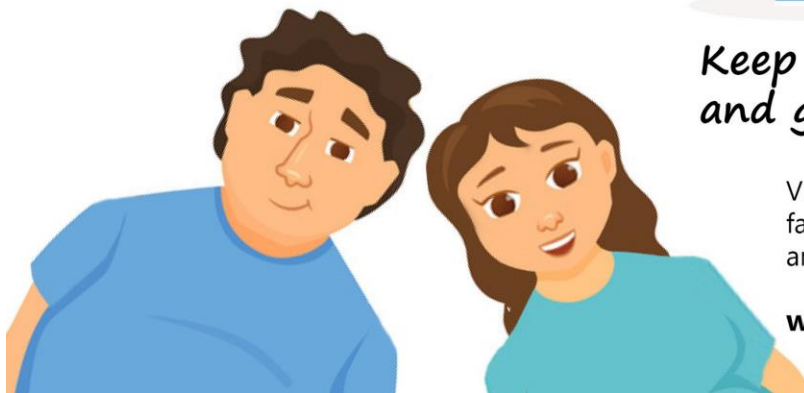

## Web Appendix D

### Study Four: Advertisements

Condition: White models

# OBESITY IS A RISK FOR Tyler & Janice.

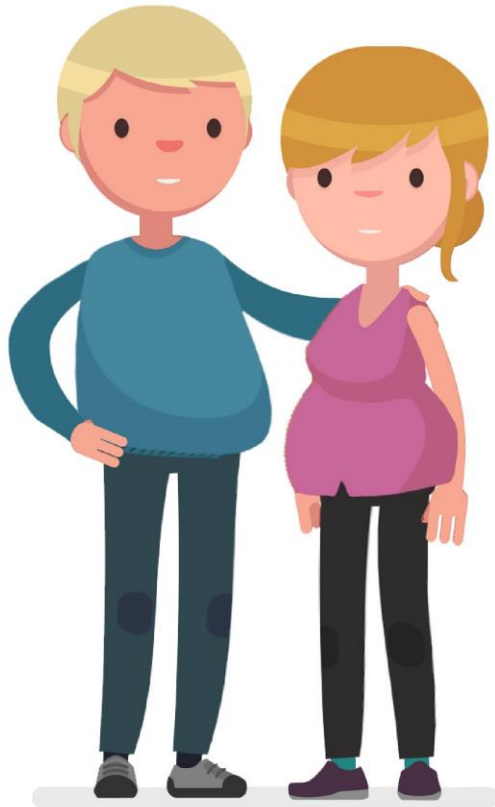

**4 in 10** people  
live with **Obesity**  
and are at **Risk** for:  
**Heart Disease**  
**Diabetes**  
**Cancer**  
**Stroke**

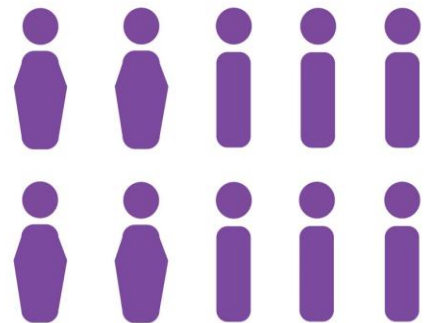

**Obesity is a heavy burden to carry. Take a load off.**

Fight obesity and stay healthy:

**Eat Healthy • Avoid Junk Food • Exercise - Get Moving!**

Check out [www.health2.org](http://www.health2.org) for more information.

# OBESITY IS A RISK FOR Tyrone & Shanice.

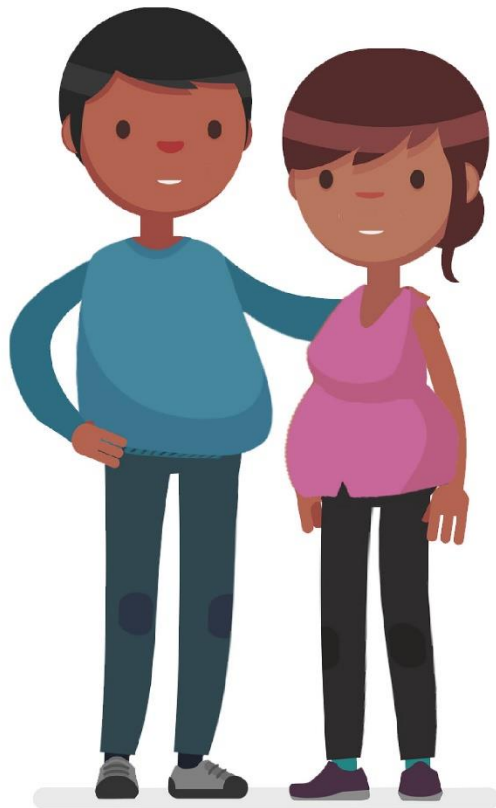

**4 in 10** people  
live with **Obesity**  
and are at **Risk** for:  
**Heart Disease**  
**Diabetes**  
**Cancer**  
**Stroke**

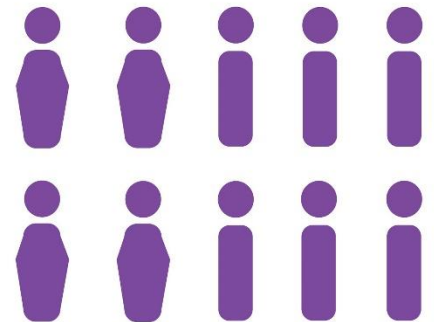

**Obesity is a heavy burden to carry. Take a load off.**

Fight obesity and stay healthy:

**Eat Healthy • Avoid Junk Food • Exercise - Get Moving!**

Check out [www.health2.org](http://www.health2.org) for more information.
